# Supplementary material for: Prediction of the carrier-mediated cation flux through polymer inclusion membranes via fundamental thermodynamic quantities: complexation study of bis(dodecyloxy)calix[4]arene-crown-6 with alkali metal cations
Source: Royal Society of Chemistry journal article supplement (doi:10.1039/a908840g), 2000-01-01
Supplement: equations.doc [file equations.doc]

Bruce A. Moyer, Chemical and Analytical Sciences Division, ORNL, P.O. Box 2008, Oak Ridge, TN 37831-6119

# SUPPLEMENTARY INFORMATION

**Prediction of the carrier-mediated cation flux through polymer inclusion membranes via fundamental thermodynamic quantities: Complexation study of bis(dodecyloxy)calix[4]arene-crown-6 with alkali metal cations**

Tatiana G. Levitskaia,a,b) Dusten M. Macdonald,a) John D. Lamb,a) and Bruce A. Moyerb)

a) Department of Chemistry and Biochemistry, Brigham Young University, Provo, UT 84602

b) Chemical and Analytical Sciences Division, Oak Ridge National Laboratory

# P.O. Box 2008, Oak Ridge, TN 37831-6119

# Supplementary Information

Appendix 1.

In this appendix, the basis for estimating formation constants in NPOE from those determined in MeCN is presented. The reaction of interest is

M+NPOE + BNPOE M•B+NPOE *G*of,NPOE(M•B+) (A1-1)

The Gibbs energy of complexation in NPOE *G*of,NPOE(M•B+)can be calculated as a sum of the Gibbs energies of the following reactions. By convention, ion partitioning is taken as occurring from water to the solvent.

a) Partitioning of the metal cation and ligand B from NPOE into water:

M+NPOE M+w -*G*op,wNPOE(M+) (A1-2)

BNPOE Bw -*G*op,wNPOE(B) (A1-3)

b) Partioning of the metal cation and ligand from water to MeCN:

M+w M+MeCN *G*op,wMeCN(M+) (A1-4)

Bw BMeCN *G*op,wMeCN(B) (A1-5)

c) Complexation reaction in MeCN:

M+MeCN + BMeCN M•B+MeCN *G*of,MeCN(M•B+) (A1-6)

d) Partitioning of the metal-ligand complex from MeCN to water:

M•B+MeCN M•B+w -*G*op,wMeCN(M•B+) (A1-7)

e) Partitioning of the metal-ligand complex from water to NPOE:

M•B+w M•B+NPOE *G*op,wNPOE(M•B+) (A1-8)

The summation of the discussed terms gives the expression for the *G*of,NPOE(M•B+):

*G*of,NPOE(M•B+) *=* *G*of,MeCN(M•B+) *+* {-*G*op,wNPOE(M+) +*G*op,wMeCN(M+)}

*+* {-*G*op,wNPOE(B) *+* *G*op,wMeCN(B)}

+ {-*G*owMeCN(M•B+) *+* *G*owNPOE(M•B+)} (A1-9)

It was assumed that the terms *G*op,worg(B)and *G*op,worg(M•B+)are approximately equal with a minor correction for the charge contribution:

*G*op,worg(M•B+) *=* *G*op,worg(B) *+* *G*ocharge,worg(M•B+) (A1-10)

Now the eq A1-9 can be simplified.

*G*of,NPOE(M•B+) =*G*of,MeCN(M•B+) - *G*op,wNPOE(M+) +*G*op,wMeCN(M+)

*+* *G*ocharge,MeCNNPOE(M•B+) (A1-11)

The charge correction term for the Gibbs energy of transfer of the metal-ligand complex from the acetonitrile to NPOE *G*ocharge,MeCNNPOE(M•B+)was estimated using the Born model as described earlier:45

*G*oMeCNNPOE(M•B+) = (1/**MeCN- 1*/*NPOE)*Bz*2/*r*i (A1-12)

where ** org is the dielectric constant of the corresponding solvent, *z* is the ion charge, *r*i is the ion radius, and *B* is a constant equal to -69.47 kJ nm mol-1. The radius of the complex ion was estimated to be 0.494 nm using the molar volume *V*i of the ion:12

*V*i/ cm3 mol-1 = 3406.6(*r*i / nm)3 (A1-13)

assuming a void fraction of 0.26 for the cubic closest packing of spheres in the hypothetical pure liquid. The molar volume of the M•B+ ion was estimated to be 411 cm3 mol-1 by the group contribution method49 taking into account only the binding part the molecule. From these considerations, the value of *G*oMeCNNPOE(M•B+) was estimated to be 2.1 kJ mol-1. The substitution of this value to the eq A1-11 results in the expression for the correction of the *G*of,MeCN(M•B+) value for the NPOE solvent:

*G*of,NPOE(M•B+) =*G*of,MeCN(M•B+) - *G*op,wNPOE(M+)

+*G*op,wMeCN(M+) + 2.1 (A1-14)

The corresponding expression for the complex formation constant in the NPOE can be written:

log *K*f,NPOE(M•B+) = log *K*f,MeCN(M•B+) +*G*op,wNPOE(M+)/(2.303*RT*)

*-* *G*op,wMeCN)/(2.303*RT*)– 2.1/(2.303*RT*) (A1-15)

To evaluate this expression, the Gibbs energy of partitioning of M+ from water to NPOE remains to be estimated as described in Appendix 2, since log *K*f,MeCN(M•B+) and *G*op,wMeCN(M+) are known from the literature or experiment.

Appendix 2.

The estimation of the Gibbs energies of ion transfer between water and NPOE based on a procedure reported elsewhere12 is presented in this Appendix. At infinite dilution on the molarity scale (TATB assumption), the Gibbs energy of ion transfer from water to NPOE *G*otr,wNPOE can be predicted by employing a reference organic solvent (r) for which the corresponding *G*otr,wr values are known

*G*otr,wNPOE =*G*otr,wr - *RT* ln *R*M,0 (A2-1)

where *R*M,0 is the equilibrium ratio of molar concentrations of ions between NPOE and the reference solvent at infinite dilution. This approach avoids treatment for aqueous-phase nonideality. Instead electrostatic contribution to nonideality of ions in the organic phase must be taken into account. The following expression holds for *R*M,0:

(A2-2)

where *V* and ** are the molar volume and the Hildebrand solubility parameter of indicated species; **r and **NPOE are relative permittivities of the reference solvent and NPOE, respectively; **o is dielectric constant of the solvation shell that is assigned value of 2; *B* is a constant equal to -69.47 kJ nm mol-1; subscripts *i* and *r* indicate ion and reference solvent, respectively. Term *r* corrects ion radius *r*i for the solvation shell. This is a distance associated with the solvent and different for cations and anions. Values of *r* were estimated using following equations:

*r* = 0.211*r*sv-0.099/(1 + 5.07**)2 for cations (A2-3)

*r* = 0.245*r*sv0.268/(1 + 0.26**)2 for anions (A2-4)

where *r*sv is an effective solvent thickness calculated from its molar volume *V*s by

*r*sv = (*V*s/cm3 mol-1)1/3/15.05 (A2-5)

Combination of eqs A2-1 and A2-2 results in

*G*otr,wNPOE =*G*otr,wr –

(A2-6)

Values of *r* for cations and anions in NPOE were adjusted by fitting reported values of Gibbs energy of Cs+, R4N+, tetraphenyl borate, and ClO4- ions partitioning between water and NPOE32 to eq A2-6. 1,2-Dichloroethane (1,2-DCE) was proposed as the reference solvent.12 In the present work, nitrobenzene (NB) was considered to possess physical properties closely resembling those of NPOE (Table A2-1) and was therefore chosen as a reference solvent. Parameters used in the calculations and the obtained *G*otr,wNPOEvalues are listed in the Table A2-2(a). For estimation of

*G*otr,wNPOE(CF3CO2-) and *G*otr,wNPOE(CF3SO3-) values, 1,2-DCE was used as a reference solvent (Table A2-2(b)), because the values of Gibbs energies of CF3CO2- and CF3SO3- ion partitioning or transfer between water and NB are not available in the literature.

Table A2-1. Solvent Parameters Used for the Estimation of *G*otr,wNPOE(I±).

| Solvent | a **  J1/2 cm-3/2 | d *V*s  cm3 mol-1 | e ** | g ** | j ** | m *r*sv  nm | p *r*s(cation)  nm | p *r*s(anion)  nm |
| --- | --- | --- | --- | --- | --- | --- | --- | --- |
| 1,2-DCE | b 20.20 | b 79.00 | b 0.00 | h 0.10 | k 10.4 | n 0.285 | n 0.301 | n 0.127 |
| NB | b 22.14 | b 103.00 | b 0.00 | h 0.30 | k 34.8 | n 0.312 | n 0.279 | n 0.171 |
| NPOE | c 19.58 | c 241.40 | f 0.00 | i 0.46 | l 24.2 | o 0.414 | q 0.289 | q 0.173 |

a Solvent Hildebrand solubility parameter.

b Taken from Marcus et al.50

c Estimate according to group contribution.49

d Solvent molar volume.

e Solvent H-bond donation index.

f For NPOE value of **  is assumed to be equal zero since NPOE can be considered as a derivative of nitrobenzene and phenyl alkyl ether, both with ** = 0.46

g Solvent H-bond acceptance index.

h Taken from Marcus et al.46

i Estimate according to group contributions.44

j Dielectric constant of the dry solvent.

k Taken from Marcus.51

l Taken from Ammann. 34

m Effective solvent thickness.

n Taken from Baes et al.12

o Estimated from molar volume according to eq A2-4.

p Solvent distance.

q *r* values for cations and anions in NPOE were adjusted by fitting reported values of Gibbs energy of Cs+, R4N+, tetraphenyl borate, and ClO4- ion partitioning between water and NPOE32 to the eq A2-3.

Table A2-2. Ion Parameters used for the estimation of *G*otr,wNPOE.

(a) NB reference solvent

| Ion | a **i  J1/2 cm-3/2 | d *V*i  cm3 mol-1 | e *r*i  nm | f *r*i,NPOE  nm | f *r* i,NB  nm | g *G*otr,wNB  kJ mol-1 | h *G*op,wNPOE  kJ mol-1 | | k *G*otr,wNPOE  kJ mol-1 |
| --- | --- | --- | --- | --- | --- | --- | --- | --- | --- |
| Observed | | estimated |
| Na+ | b 10.0 | 3.62 | 0.102 | 0.921 | 0.283 | 36 | i 36.3 | | 42 |
| K+ | b 10.9 | 9.15 | 0.139 | 0.297 | 0.290 | 21 |  | | 27 |
| Rb+ | b 13.1 | 11.27 | 0.149 | 0.300 | 0.293 | 19 |  | | 24 |
| Cs+ | b 14.0 | 16.44 | 0.169 | 0.305 | 0.298 | 18 | j 23 | | 23 |
| Cl- | b 16.9 | 20.54 | 0.182 | 0.224 | 0.223 | 35 | i 43.1 | | 40 |
| Br- | b 20.8 | 25.65 | 0.196 | 0.233 | 0.232 | 29 | i 33.8 | | 34 |
| I- | b 26.5 | 37.27 | 0.222 | 0.253 | 0.252 | 18 | i 21.1 | | 24 |
| NO3- | b 25.8 | 23.0 | 0.189 | 0.229 | 0.227 | 24 | i 21.8 | | 29 |
| CNS- | c 27.6 | 32.92 | 0.213 | 0.246 | 0.245 | 16 | i 19.2 | | 22 |
| ClO4- | b 25.8 | 45.93 | 0.238 | 0.265 | 0.264 | 10 | i 10.6 | j 13-15 | 15 |
| TPB- | b 19.8 | 252.39 | 0.420 | 0.431 | 0.429 | -36 | i -24.8 | j -30.1 | -32 |

(b) 1,2-DCE reference solvent

| Ion | a **i  J1/2 cm-3/2 | l *V*i  cm3 mol-1 | m *r*i  nm | f *r*i,NPOE  nm | f *r*i,DCE  nm | n *G*op,wDCE  kJ mol-1 | k *G*otr,wNPOE  kJ mol-1  estimated |
| --- | --- | --- | --- | --- | --- | --- | --- |
| CF3CO2- | c 17.2 | 75.5 | 0.281 | 0.301 | 0.289 | 34.9 | 27 |
| CF3SO3- | c 16.5 | 85.1 | 0.292 | 0.311 | 0.300 | 20.4 | 13 |

a Hildebrand solubility parameter.

b Taken from Baes et al.12

c Estimate according to group contributions.49

d Ion molar volume, estimated from the ion radius by eq A2-5.

e Ion radius, taken from Marcus et al.50

f Ion effective radius adjusted with the solvent thickness by eq A2-6: *r*i,s = (*r*i3 + *rs*3)1/3.12

g Gibbs energy of ion transfer between water and NB taken from Marcus.11

h Observed Gibbs energy of ion partitioning between water and NPOE.

i Taken from Chrisstoffels.15

j Taken from Zamec et al.32

k Estimated Gibbs energy of ion transfer between water and NPOE, this work.

l Ion molar volume, estimated according to group contributions.49

m Ion radius, estimated from molar volume by inverse of eq A2-5.12

n Gibbs energy of ion partitioning between water and 1,2-DCE taken from Levitskaia et al.52
